# Supplementary material for: Age-dependent regulation of cell-mediated collagen turnover
Source: JCI journal article supplement (doi:10.1172/jci.insight.137519), 2020-04-21
Supplement: sd1 [file 1]

## Supplemental Methods

### Mouse QPCR primers:

#### *Col1a1*

F: CGATGGATTCCCGTTTCGAGT

R: CGATCTCGTTGGATCCCTGG

#### *Col1a2*

F: CTGGTCCTGTTGGAAGTCGT

R: CAGATGCACCTGTTTCTCCA

#### *Mmp1*

F: AACTACATTTAGGGGAGAGGTGT

R: GCAGCGTCAAGTTTAACTGGAA

#### *Mmp2*

F: CAAGTTCCCCGGCGATGTC

R: TTCTGGTCAAGGTCACCTGTC

#### *Mmp3*

F: ACATGGAGACTTTGTCCCTTTTG

R: TTGGCTGAGTGGTAGAGTCCC

#### *Mmp7*

F: CTGCCACTGTCCCAGGAAG

R: GGGAGAGTTTTCCAGTCATGG

#### *Mmp8*

F: TCTTCCTCCACACACAGCTTG

R: CTGCAACCATCGTGGCATTG

*Mmp9*

F: CTGGACAGCCAGACACTAAAG

R: CTCGCGGCAAGTCTTCAGAG

*Mmp13*

F: CTTCTTCTTGTTGAGCTGGACTC

R: CTGTGGAGGTCACTGTAGACT

*Mmp14*

F: CAGTATGGCTACCTACCTCCAG

R: GCCTTGCCTGTCACTTGTAAG

*Timp1*

F: GCAACTCGGACCTGGTCATAA

R: CGGCCCGTGATGAGAACT

*Timp2*

F: TCAGAGCCAAAGCAGTGAGC

R: GCCGTGTAGATAAACTCGATGTC

*Timp3*

F: CTTCTGCAACTCCGACATCGT

R: GGGGCATCTTACTGAAGCCTC

*Timp4*

F: TGTCTACACGCCATTTGACTC

R: TGGACATCTCCTTACTTGGCA

*Ddr1*

F: ATGCTGACATGAAGGGACATTT

R: GGTGTAGCCTACGAAGGTCCA

*Ddr2*

F: ATCACAGCCTCAAGTCAGTGG

R: TTCAGGTCATCGGGTTGCAC

*Itga1*

F: CCTTCCCTCGGATGTGAGTCA

R: AGTTCTCCCCGTATGGTAAGA

*Itga2*

F: TGTCTGGCGTATAATGTTGGC

R: CTTGTGGGTTCGTAAGCTGCT

*Itgb1*

F: ATGCCAAATCTTGCGGAGAAT

R: TTTGCTGCGATTGGTGACATT

*Mfge8*

F: AGATGCGGGTATCAGGTGTGA

R: GGGGCTCAGAACATCCGTG

*Fap*

F: GTCACCTGATCGGCAATTTGT

R: CCCCATCTGAAGGTCGTAGAT

*Mrc1*

F: CCACTCTGGGCCATGAGGCTTC

R: CTGAATGATCGCATGCTCATTC

*Mrc2*

F: GAGTCACCCCAGTCTGCAAT

R: CACTGCCATCGAAGACTCAA

*Ctsk*

F: GAAGAAGACTCACCAGAAGCAG

R: TCCAGGTTATGGGCAGAGATT

*Ctsb*

F: TCCTTGATCCTTCTTTCTTGCC

R: ACAGTGCCACACAGCTTCTTC

*Ctsd*

F: GCTTCCGGTCTTTGACAACT

R: CACCAAGCATTAGTTCTCCTCC

*Ctsl*

F: ATCAAACCTTTAGTGCAGAGTGG

R: CTGTATTCCCCGTTGTGTAGC

*Ctss*

F: CCATTGGGATCTCTGGAAGAAAA

R: TCATGCCCCACTTGGTAGGTAT

*Gapdh*

F: GTTGTCTCCTGCGACTTCA

R: GGTGGTCCAGGGTTTCTTA

*Actb*

F: CCAACCGTGAAAAGATGACC

R: ACCAGAGGCATACAGGGACA

Human QPCR Primers:

*MRC2*

F: CACTGCTATTCTTTCCACAT

R: ACATTCTCCATCTCATCCA

*MZF1*

F: AGTGTAAGCCCTCACCTCC

R: GGGTCCTGTTCACTCCTCAG

*ACTB*

F: AGAGCTACGAGCTGCCTGAC

R: AGCACTGTGTTGGCGTACAG

## Supplemental Figure Legends

Supplemental Figure 1. (A-D) Collagen transcription and *Mrc2* transcription in whole lung decrease during the lifespan. Normalized transcriptomic data from lung over the mouse lifespan at indicated timepoints for *Mrc2* (A), *Col1a1* (B), *Col1a2* (C), *Col3a1* (D), N=3-6; data are re-analyzed from: GSE132040.

Supplemental Figure 2. *Mrc1* (Mannose receptor) transcript or protein levels are not decreased during the lifespan. (A) Representative Western blot for *Mrc1* in young versus mature whole mouse lung specimens, N=4 male mice in each group. (B) QPCR of *Mrc1* from young vs. mature mouse whole lung N=5 male mice in each group. (C) Normalized transcriptomic data from lung over the mouse lifespan for *Mrc1*.

Supplemental Figure 3. Flow gating strategy. Gating strategy as pictured demonstrates gating out debris, gating for singlets, gating for live cells, gating for CD45 and then F4/80 or PDGFRA.

Supplemental Figure 4. Validation of MRC2 antibody for flow cytometric applications. (A) HEK293T cells were transfected with pCI-*Mrc2* and then stained with the sheep anti-MRC2 antibody; an untransfected control is shown as is a control without primary antibody. (B) Lysates were made from cells sorted from gates in panel (A) and then Western blot analysis was performed. (C) Flow staining of MRC2 on CD45-PDGFR $\alpha$ -cells is shown, N=2-4.

Supplemental Figure 5. Validation of *MZF1* reagents. (A) QPCR for *MZF1* after shRNA knockdown of *MZF1* in U937 cells vs. Scramble or sh-*MRC2* controls, N=5. (B) Flow cytometry for BFP in lipofectamine treated versus Empty Vector (EV, BFP only) or *MZF1*-BFP transfected cells. (C) Q-RT-PCR for *MZF1* in lipofectamine treated versus Empty vector (BFP only) or *MZF1*-BFP transfected cells. (D) Western blot of cell lysates from same conditions as (C) for *MZF1* (100kD and 129kD bands are shown, endogenous *MZF1* in U2OS cells appears at 100kD, the construct used in this figure has a 29kD BFP fused to *MZF1* giving a predicted molecular weight of 129kD); GAPDH is a loading control. Statistics: (A) ANOVA.

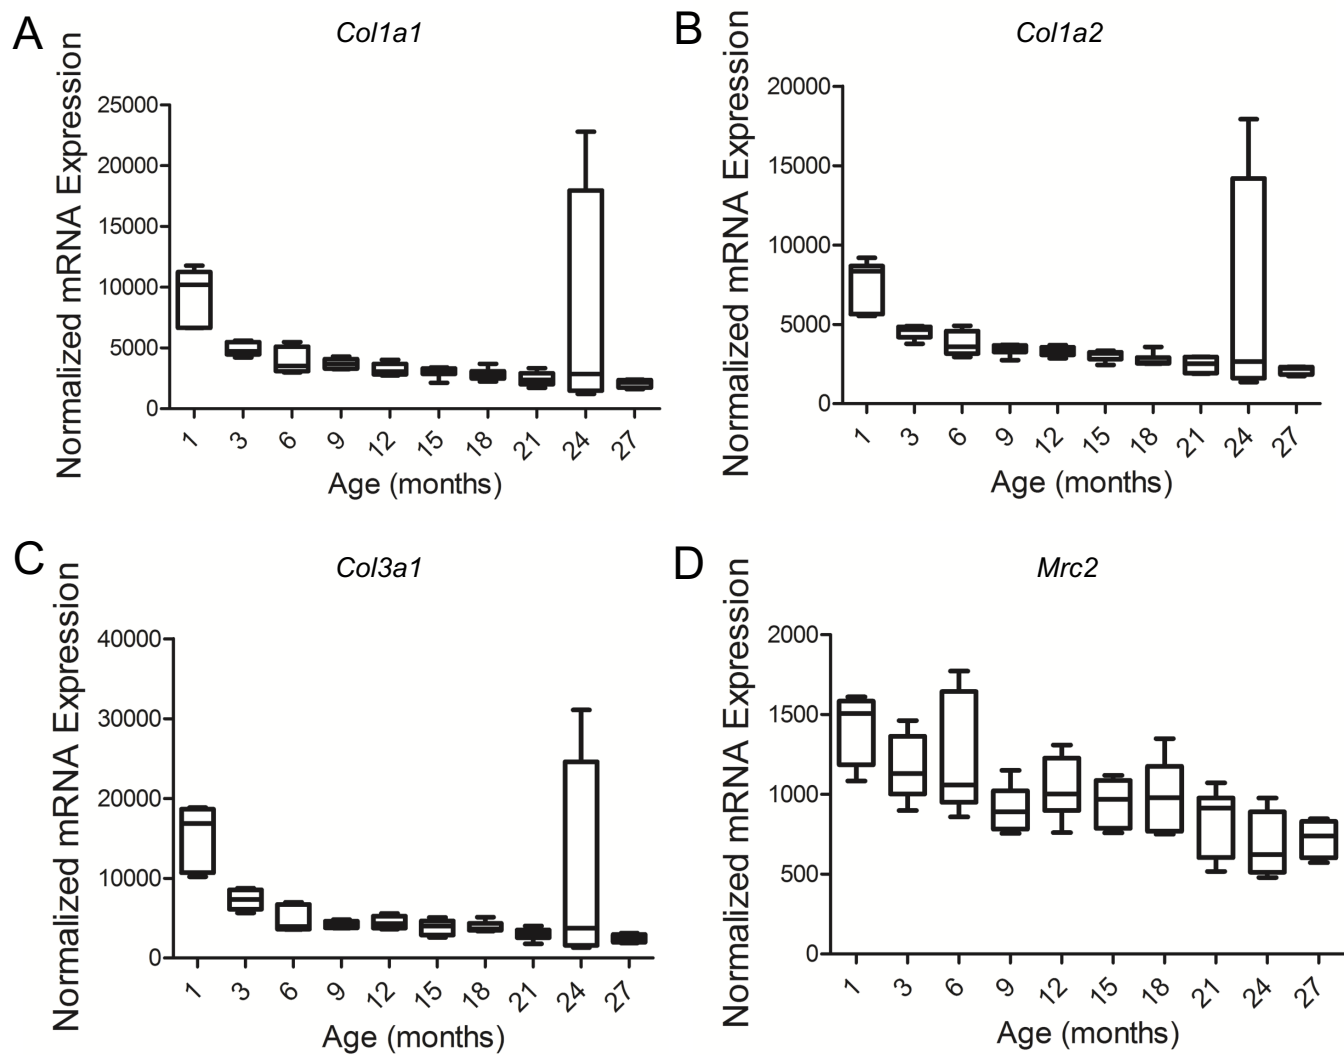

Supplemental Figure 1. (A-D) Collagen transcription and *Mrc2* transcription in whole lung decrease during the lifespan. Normalized transcriptomic data from lung over the mouse lifespan at indicated timepoints for *Mrc2* (A), *Col1a1* (B), *Col1a2* (C), *Col3a1* (D), N=3-6; data are re-analyzed from: GSE132040.



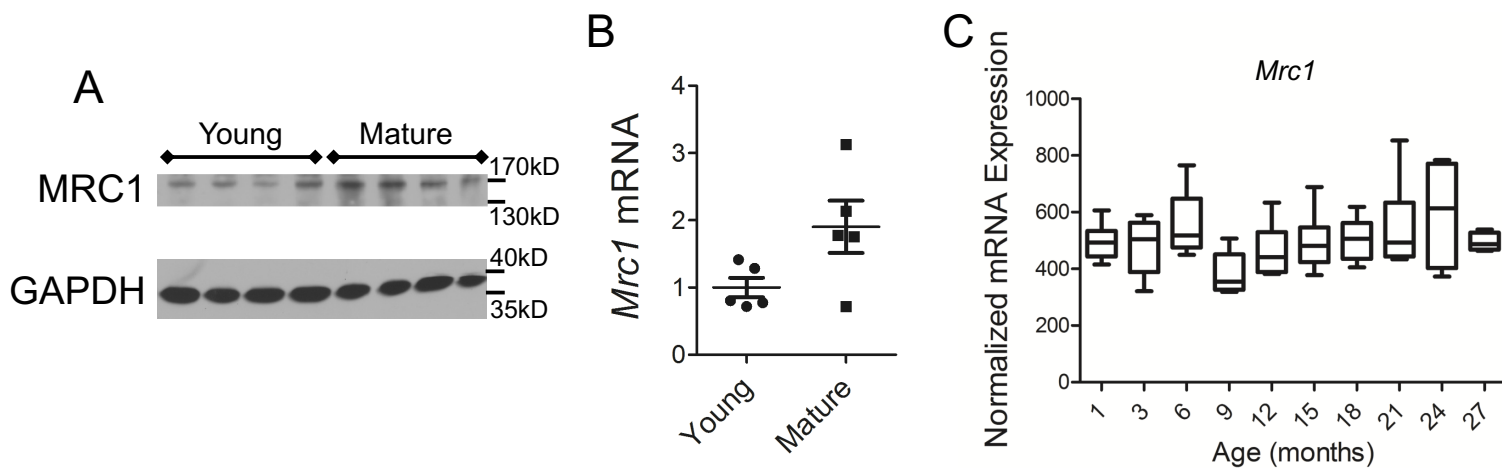

Supplemental Figure 2. *Mrc1* (Mannose receptor) transcript or protein levels are not decreased during the lifespan. (A) Representative Western blot for *Mrc1* in young versus mature whole mouse lung specimens, N=4 male mice in each group. (B) QPCR of *Mrc1* from young vs. mature mouse whole lung N=5 male mice in each group. (C) Normalized transcriptomic data from lung over the mouse lifespan for *Mrc1*.

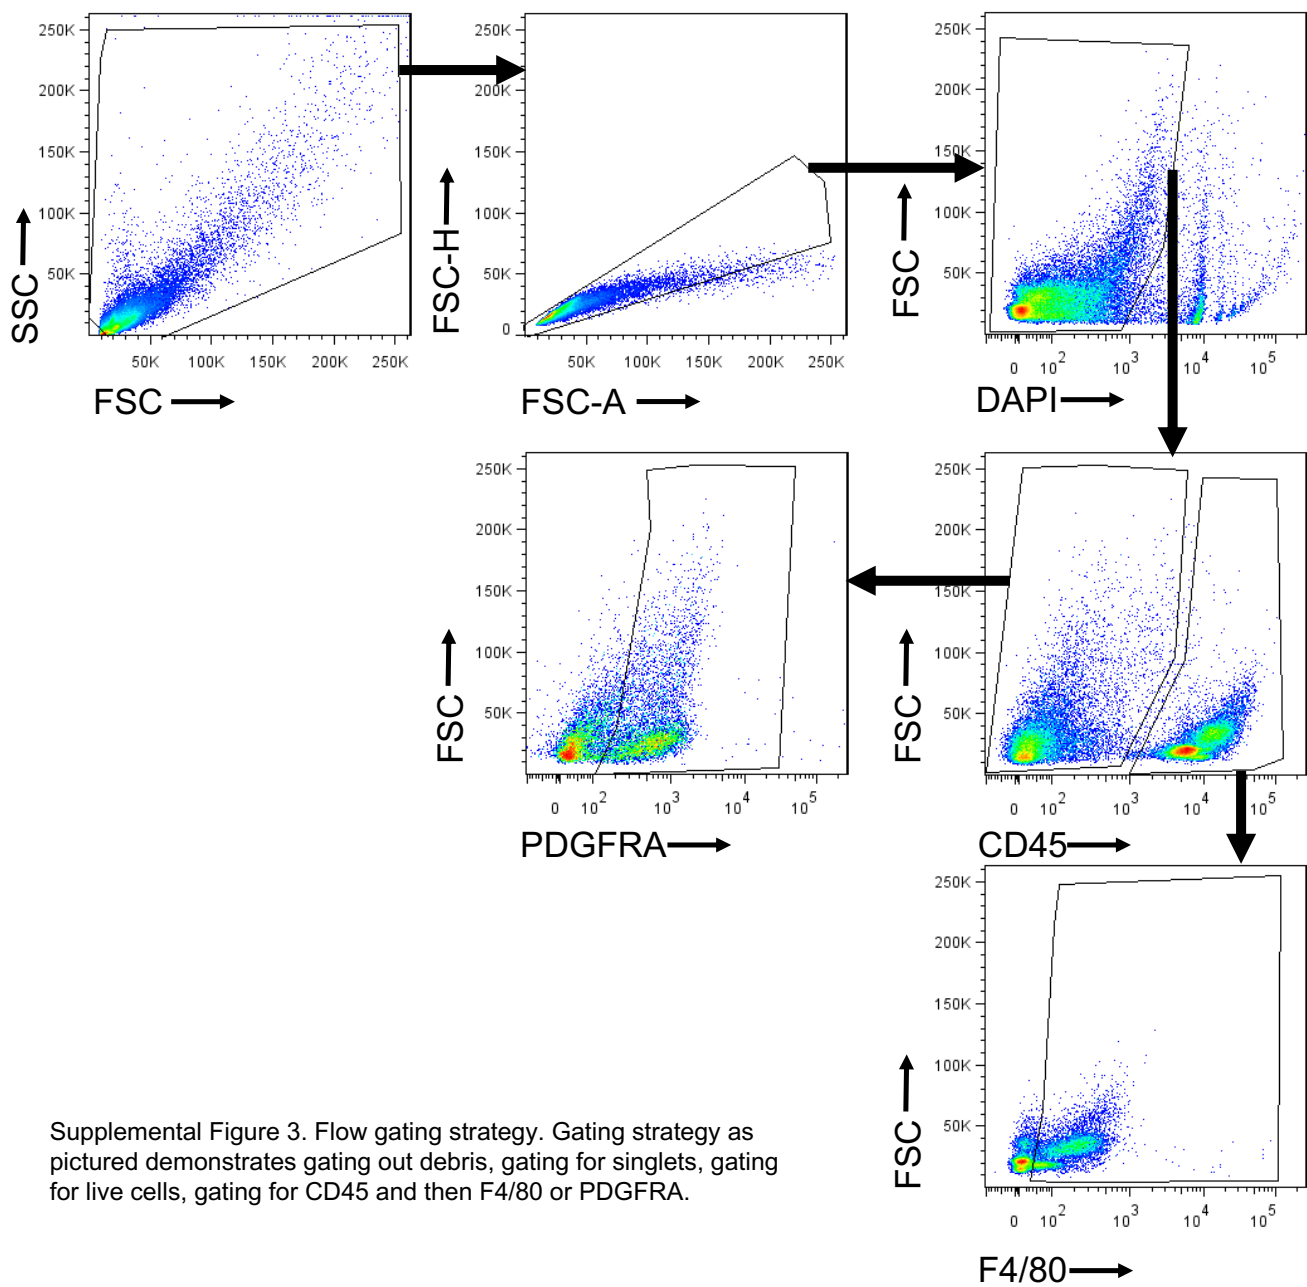

Supplemental Figure 3. Flow gating strategy. Gating strategy as pictured demonstrates gating out debris, gating for singlets, gating for live cells, gating for CD45 and then F4/80 or PDGFRA.

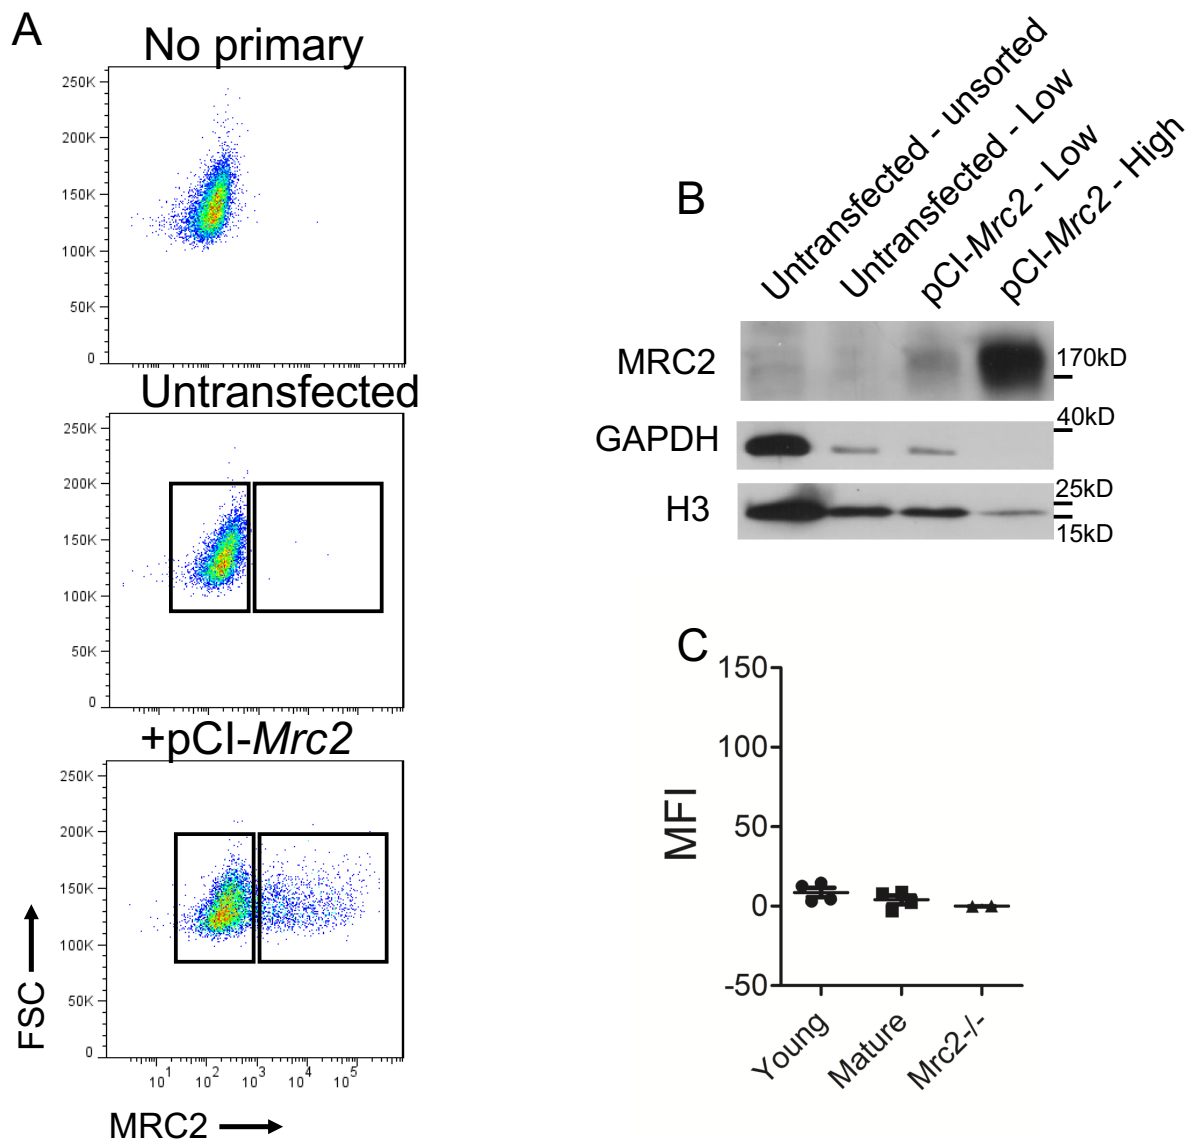

Supplemental Figure 4. Validation of MRC2 antibody for flow cytometric applications. (A) HEK293T cells were transfected with pCI-Mrc2 and then stained with the sheep anti-MRC2 antibody; an untransfected control is shown as is a control without primary antibody. (B) Lysates were made from cells sorted from gates in panel (A) and then Western blot analysis was performed. (C) Flow staining of MRC2 on CD45-PDGFR $\alpha$ <sup>-</sup> cells is shown, N=2-4.

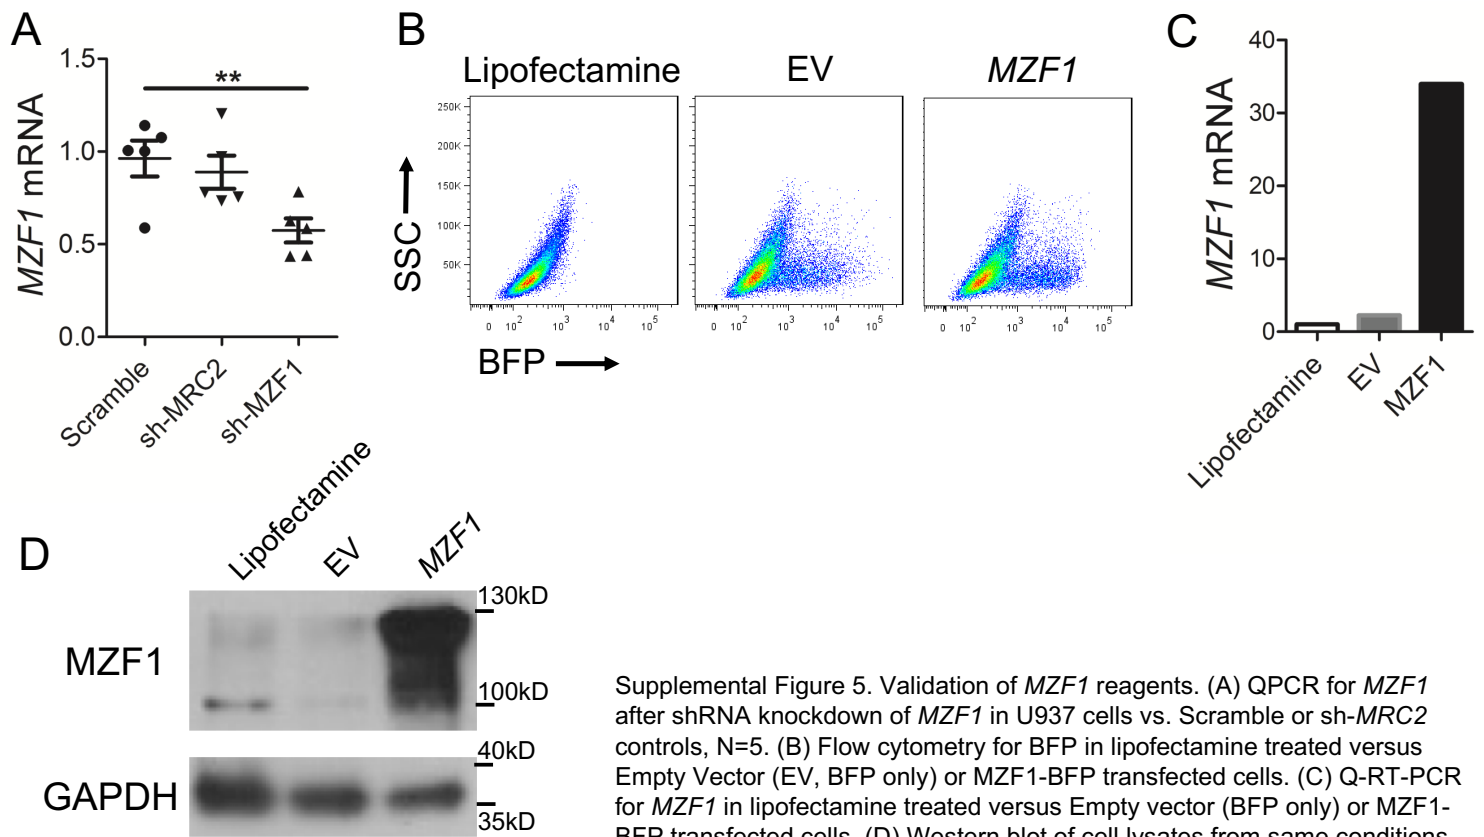

Supplemental Figure 5. Validation of *MZF1* reagents. (A) QPCR for *MZF1* after shRNA knockdown of *MZF1* in U937 cells vs. Scramble or sh-*MRC2* controls, N=5. (B) Flow cytometry for BFP in lipofectamine treated versus Empty Vector (EV, BFP only) or MZF1-BFP transfected cells. (C) Q-RT-PCR for *MZF1* in lipofectamine treated versus Empty vector (BFP only) or MZF1-BFP transfected cells. (D) Western blot of cell lysates from same conditions as (C) for MZF1 (100kD and 129kD bands are shown, endogenous MZF1 in U2OS cells appears at 100kD, the construct used in this figure has a 29kD BFP fused to MZF1 giving a predicted molecular weight of 129kD); GAPDH is a loading control. Statistics: (A) ANOVA.
